# Supplementary material
Source: publisher figshare collection journal article supplement (https://asha.figshare.com/ndownloader/files/28102479)
Supplement: Supplementary file 1 [file 28102479]

## Sheet: Sheet1
Supplemental material, Clark & Reuterskiöld, "Orthographic Support for Word Learning in Clinical Populations: A Systematic Review," LSHSS, https://doi.org/10.1044/2021_LSHSS-20-00123
Supplemental Material S1.		Search strategy.
		Concept 1 (Problem/Population):		Concept 2 (Intervention):		Other Concepts/Terms:	Dates
Databases:		Concept 1 Search Terms		Concept 2 Search Terms
MEDLINE via PubMed		"Language Development Disorders"[Mesh])		"Paired-Associate Learning"[Mesh]		Orthograph*	through 12/10/2019
		OR		OR
		Child Development Disorders, Pervasive[Mesh])		semantics[Mesh]
		OR		OR
		Communication Disorders[Mesh])	AND	word learning	AND
		OR		OR
		"language disorder"		vocabulary
		OR
		DLD
		OR
		SLI
		OR
		Down Syndrome[Mesh])
		OR
		Hearing Disorders[Mesh])
		OR
		Cochlear Implants[Mesh])
		OR
		Cerebral Palsy[Mesh])
		OR
		"Intellectual Disability"[Mesh])
		OR
		"Dyslexia"[Mesh])
		OR
		Autistic Disorder[Mesh])
		OR
		"Autism Spectrum Disorder"[Mesh])
CINAHL via EBSCO		(MH "Language Disorders+")		"word learning"		"orthograph*"	Through 12/10/2019
		OR		OR
		specific language impairment		(MH "Semantics")
		OR		OR
		language impairment	AND	Vocabulary	AND
		OR
		developmental language disorder
		OR
		DLD
		OR
		SLI
		OR
		(MH "Down Syndrome")
		OR
		(MH "Hearing Disorders+")
		OR
		(MH "Cochlear Implant+")
		OR
		(MH "Cerebral Palsy")
		OR
		(MH "Intellectual Disability+")
		OR
		(MH "Dyslexia+")
		OR
		(MH "autistic disorder")
		OR
		"autism"
ERIC		developmental language disorder		word learning		orthograph*	Through 12/10/2019
		OR		OR
		language impairment		semantics
		OR		OR
		specific language impairment	AND	vocabulary	AND
		OR
		Language Disorders
		OR
		SLI
		OR
		DLD
		OR
		Down Syndrome
		OR
		Hearing Disorders
		OR
		Cochlear Implant
		OR
		Cerebral Palsy
		OR
		Intellectual Disability
		OR
		dyslexia
		OR
		autism
		OR
		autistic disorder
PsycINFO via Ovid		developmental language disorder		word learning		orthograph*	Through 12/10/2019
		OR		OR
		DLD		semantics
		OR		OR
		language impairment	AND	vocabulary	AND
		OR
		SLI
		OR
		specific language impairment
		OR
		Language Disorders
		OR
		Down Syndrome
		OR
		Hearing Disorders
		OR
		Cochlear Implant
		OR
		Cerebral Palsy
		OR
		Intellectual Disability
		OR
		dyslexia
		OR
		Autistic disorder
		OR
		autism
SCOPUS		( ( TITLE-ABS-KEY ( developmental AND language AND disorder )		( ( TITLE-ABS-KEY ( word AND learning )			Through 12/10/2019
		OR		OR		( TITLE-ABS-KEY ( orthograph* ) )
		TITLE-ABS-KEY ( dld )		TITLE-ABS-KEY ( semantics ) ) )
		OR		OR
		TITLE-ABS-KEY ( language AND impairment )	AND	TITLE-ABS-KEY ( vocabulary ))	AND
		OR
		TITLE-ABS-KEY ( sli )
		OR
		TITLE-ABS-KEY ( specific AND language AND impairment )
		OR
		TITLE-ABS-KEY ( language AND disorders ) ) )
		OR
		TITLE-ABS-KEY ( down AND syndrome )
		OR
		TITLE-ABS-KEY ( hearing AND disorder )
		OR
		TITLE-ABS-KEY ( cochlear AND implant )
		OR
		TITLE-ABS-KEY ( cerebral AND palsy )
		OR
		TITLE-ABS-KEY ( intellectual AND disability )
		OR
		TITLE-ABS-KEY ( dyslexia )
		OR
		TITLE-ABS-KEY ( autism )
		OR
		TITLE-ABS-KEY ( autistic AND disorder )
